# Supplementary material
Source: publisher figshare collection journal article supplement (https://sage.figshare.com/ndownloader/files/17636567)
Supplement: Supplementary file 1 [file 17636567]

Archive with 2 entries (2 files):
- Supplement_file_1.pdf
- Supplement_file_2.pdf
