# Supplementary material
Source: publisher figshare collection journal article supplement (https://sage.figshare.com/ndownloader/files/17636567)
Supplement: Supplementary file 1 [file 17636567 › Supplement_file_1.pdf]

## Supplement 1 Disease related characteristics based on arthritis aetiology of patients undergoing hemiresection interposition arthroplasty

|                                             |                                                                       |         |
|---------------------------------------------|-----------------------------------------------------------------------|---------|
| <b>Inflammatory arthritis</b><br>n = 55     | <b>Type, n (%)</b>                                                    |         |
|                                             | Rheumatoid arthritis                                                  | 47 (85) |
|                                             | Juvenile rheumatoid arthritis                                         | 7 (13)  |
|                                             | Systemic lupus erythematosus                                          | 2 (4)   |
|                                             | Psoriatic arthritis                                                   | 1 (2)   |
|                                             | Hidradenitis suppurativa arthritis                                    | 1 (2)   |
|                                             | Unknown                                                               | 1 (2)   |
|                                             | <b>Rheumatoid factor†, n (%)</b>                                      |         |
|                                             | Seropositive                                                          | 30 (65) |
|                                             | Seronegative                                                          | 16 (35) |
|                                             | <b>Arthritis treatment received one year prior to surgery^, n (%)</b> |         |
|                                             | Splint                                                                | 20 (38) |
|                                             | Daily NSAIDs                                                          | 23 (43) |
| <b>Non-inflammatory arthritis</b><br>n = 11 | Steroid injection                                                     | 6 (11)  |
|                                             | Oral steroids                                                         | 29 (55) |
|                                             | DMARD                                                                 | 31 (58) |
|                                             | Methothrexate                                                         | 26 (49) |
|                                             | No prior treatment                                                    | 5 (9)   |
|                                             | <b>Radiographs</b>                                                    |         |
|                                             | Presence of osteoarthritis*                                           | 36 (88) |
|                                             | Subluxation of distal radioulnar joint~                               | 19 (50) |
|                                             | <b>Type, n (%)</b>                                                    |         |
|                                             | Post-traumatic arthritis                                              | 9 (82)  |
|                                             | Degenerative arthritis                                                | 1 (9)   |
|                                             | Unknown                                                               | 1 (9)   |
|                                             | <b>Arthritis treatment received one year prior to surgery, n (%)</b>  |         |
|                                             | Splint                                                                | 4 (36)  |
|                                             | Daily NSAIDs                                                          | 1 (9)   |
|                                             | Steroid injection                                                     | 1 (9)   |
|                                             | No prior treatment                                                    | 6 (55)  |
|                                             | <b>Radiographs^, n (%)</b>                                            |         |
|                                             | Presence of osteoarthritis                                            | 6 (67)  |
|                                             | Subluxation of distal radioulnar joint                                | 5 (56)  |

Abbreviation: DMARD = Disease-Modifying Antirheumatic Drug; NSAID = NonSteroidal Anti-Inflammatory Drug. Missing cases: †9 missing; ^2 missing; \*14 missing; ~17 missing.
