# Supplementary material
Source: publisher figshare collection journal article supplement (https://sage.figshare.com/ndownloader/files/17636567)
Supplement: Supplementary file 1 [file 17636567 › Supplement_file_2.pdf]

**Supplement 2 Multivariable linear regression of factors associated with QuickDASH after hemiresection interposition arthroplasty**

|                                                                                                            | Coefficient<br><i>b</i> | Standard<br>Error | 95% CI       | <i>p</i> - value |
|------------------------------------------------------------------------------------------------------------|-------------------------|-------------------|--------------|------------------|
| <b>QuickDASH score (<math>R^2 = 32\%</math>; Adjusted <math>R^2 = 16\%</math>; <i>p</i>-value = 0.127)</b> |                         |                   |              |                  |
| Body Mass Index                                                                                            | 0.81                    | 0.66              | -0.5 - 2.2   | 0.233            |
| Smoking                                                                                                    | 12.59                   | 12.53             | -13.7 - 38.9 | 0.328            |
| Post-traumatic osteoarthritis                                                                              | 6.24                    | 10.88             | -16,6 - 29.1 | 0.574            |
| Subluxation on radiograph                                                                                  | 5.08                    | 9.46              | -14.8 - 25.0 | 0.590            |
